# Supplementary material for: Sub-Newtonian coalescence in polymeric fluids
Source: Royal Society of Chemistry journal article supplement (doi:10.1039/d3sm00069a), 2023-01-01
Supplement: d3sm00069a1.pdf [file d3sm00069a1.pdf]

# Supplementary information for "Sub-Newtonian coalescence in polymeric fluids"

Abhineet Singh Rajput,<sup>†</sup> Sarath Chandra Varma,<sup>†</sup> and Alope Kumar<sup>\*,†</sup>

<sup>†</sup>*Department of Mechanical Engineering, Indian Institute of Science, Bangalore, India*

E-mail: \*alokekumar@iisc.ac.in

## Theory

### Giesekus and linear PTT equation under high Weissenberg creeping flow limit

To show that the upper convected derivative is the predominant term in high  $Wi$  low  $Re$  flows as proposed by Renardy<sup>1</sup> we decompose the stress tensor under quasi-steady assumption such that we are able to look at the magnitude of individual component in Eq (4) of manuscript in elasticity dominated regime.

Eq (4) under high  $Wi$  creep flow and quasi-steady assumption is simplified to S-1 Giesekus:

$$\overset{\nabla}{\boldsymbol{\tau}}^* + \kappa \text{tr}(\boldsymbol{\tau})^* \boldsymbol{\tau}^* = 0 \quad (\text{S-1 PTT})$$

$$\overset{\nabla}{\boldsymbol{\tau}}^* + A \boldsymbol{\tau}^* \boldsymbol{\tau}^* = 0 \quad (\text{S-1 Giesekus})$$

The analysis presented is for a two-dimensional plane. The velocity vector in 2D can be defined as  $\mathbf{v} := (u, v)$ . We use this to create a symmetric tensor  $T^1 := \mathbf{v} \otimes \mathbf{v}$ . Next we define a vector  $\mathbf{w}$  such that  $\mathbf{v} \times \mathbf{w} = \mathbf{1}$  and  $\mathbf{v} \cdot \mathbf{w} = 0$ . Using this we find  $\mathbf{w} = (\frac{-v}{u^2+v^2}, \frac{u}{u^2+v^2})$ . Similar to  $\mathbf{v}$  we use  $\mathbf{w}$  to define another symmetric tensor  $T^2 := \mathbf{w} \otimes \mathbf{w}$ . Using  $\mathbf{v}$  and  $\mathbf{w}$  we can define a third symmetric tensor as  $T^3 := \mathbf{v} \otimes \mathbf{w} + \mathbf{w} \otimes \mathbf{v}$ .

Stress tensor  $\tau$  is symmetric, second-order tensor with rank=3 and it can be written in the basis spanned by the three tensors  $T^1, T^2, T^3$  as:

$$\tau = \alpha T^1 + \beta T^2 + \gamma T^3; \text{ where } \alpha, \beta, \text{ and } \gamma \text{ are functions of } (x, y) \quad (\text{S-2})$$

On substituting this decomposition of stress tensor in Eq (S-1), individual terms can be simplified to obtain three new equations owing to the linear independence of basis tensors. Few of the key results that will be important to proceed ahead:

$$\mathbf{v} \cdot \mathbf{w} = 0 \Leftrightarrow v_i w_i = 0, \quad \mathbf{w} \cdot \mathbf{w} = \frac{1}{\|\mathbf{v}\|^2} \Leftrightarrow w_i w_i = \frac{1}{\|\mathbf{v}\|^2}, \quad \mathbf{v} \cdot \mathbf{v} = \|\mathbf{v}\|^2 \Leftrightarrow v_i v_i = \|\mathbf{v}\|^2$$

The first term of eq (1)  $\overset{\vee}{\tau}^*$  has three sub-terms. Note we will drop stars from now on for ease of notations.

- $\mathbf{v} \cdot \nabla \tau = \frac{\partial \tau_{ij}}{\partial x_k} v_k$  when double contracted with  $\mathbf{v} \otimes \mathbf{v}$  we obtain:  $\frac{\partial \tau_{ij}}{\partial x_k} v_k v_i v_j$

$$\begin{aligned} v_k v_i v_j \frac{\partial \tau_{ij}}{\partial x_k} &= v_k v_i v_j \frac{\partial (\alpha v_i v_j + \beta w_i w_j + \gamma (v_i w_j + w_i v_j))}{\partial x_k} \\ &= v_k v_i v_j \left( v_i v_j \frac{\partial \alpha}{\partial x_k} + \alpha v_i \frac{\partial v_j}{\partial x_k} + \alpha v_j \frac{\partial v_i}{\partial x_k} + \gamma v_i \frac{\partial w_j}{\partial x_k} + \gamma v_j \frac{\partial w_i}{\partial x_k} \right) \end{aligned}$$

While expanding the derivative, we have dropped the terms corresponding to orthogonality of  $\mathbf{v}, \mathbf{w}$

$$= \|\mathbf{v}\|^4 \nabla \alpha \cdot \mathbf{v} + 2\|\mathbf{v}\|^2 \alpha ((\nabla \mathbf{v}) \mathbf{v}) \cdot \mathbf{v} + 2\gamma \|\mathbf{v}\|^2 ((\nabla \mathbf{w}) \mathbf{v}) \cdot \mathbf{v}$$

- $(\nabla \mathbf{v})\boldsymbol{\tau}$  when double contracted with  $\mathbf{v} \otimes \mathbf{v}$  we obtain:  $\frac{\partial v_i}{\partial x_k} \tau_{kj} v_i v_j$

$$\begin{aligned} \frac{\partial v_i}{\partial x_k} \tau_{kj} v_i v_j &= v_i v_j \frac{\partial v_i}{\partial x_k} (\alpha v_k v_j + \beta w_k w_j + \gamma (v_k w_j + w_k v_j)) \\ &= \|\mathbf{v}\|^2 \left( \alpha ((\nabla \mathbf{v})\mathbf{v}) \cdot \mathbf{v} + \gamma ((\nabla \mathbf{v})\mathbf{w}) \cdot \mathbf{v} \right) \end{aligned}$$

- $\boldsymbol{\tau}(\nabla \mathbf{v})^T$  when double contracted with  $\mathbf{v} \otimes \mathbf{v}$  we obtain:  $\tau_{ik} \frac{\partial v_j}{\partial x_k} v_i v_j$

$$\begin{aligned} \tau_{ik} \frac{\partial v_j}{\partial x_k} v_i v_j &= (\alpha v_i v_k + \beta w_i w_k + \gamma (v_i w_k + w_i v_k)) v_i v_j \frac{\partial v_j}{\partial x_k} \\ &= \|\mathbf{v}\|^2 \left( \alpha ((\nabla \mathbf{v})\mathbf{v}) \cdot \mathbf{v} + \gamma ((\nabla \mathbf{v})\mathbf{w}) \cdot \mathbf{v} \right) \end{aligned}$$

- $\kappa \text{tr}(\boldsymbol{\tau})\boldsymbol{\tau}$  when double contracted with  $\mathbf{v} \otimes \mathbf{v}$  we obtain:  $\kappa \tau_{kk} \tau_{ij} v_i v_j$

$$\kappa \tau_{kk} \tau_{ij} v_i v_j = \kappa (\alpha v_k v_k + \beta w_k w_k + \gamma (v_k w_k + w_k v_k)) (\alpha v_i v_j + \beta w_i w_j + \gamma (v_i w_j + w_i v_j)) v_i v_j$$

$$= \kappa \|\mathbf{v}\|^4 \alpha (\alpha \|\mathbf{v}\|^2 + \beta \|\mathbf{w}\|^2)$$

- $A\boldsymbol{\tau}\boldsymbol{\tau}$  when double contracted with  $\mathbf{v} \otimes \mathbf{v}$  we obtain:  $A \tau_{ik} \tau_{kj} v_i v_j = A (\alpha^2 \|\mathbf{v}\|^2 + \gamma^2 \|\mathbf{w}\|^2) \|\mathbf{v}\|^4$

On putting all terms corresponding to Linear PTT together:

$$\|\mathbf{v}\|^4 \nabla \alpha \cdot \mathbf{v} + 2\gamma \|\mathbf{v}\|^2 (((\nabla \mathbf{w})\mathbf{v}) \cdot \mathbf{v} - ((\nabla \mathbf{v})\mathbf{w}) \cdot \mathbf{v}) + \|\mathbf{v}\|^4 \alpha \kappa (\alpha \|\mathbf{v}\|^2 + \beta \|\mathbf{w}\|^2) = 0 \quad (\text{S-3})$$

$$(\mathbf{v} \cdot \nabla) \alpha + 2\gamma \frac{(((\nabla \mathbf{w}) \mathbf{v}) \cdot \mathbf{v} - ((\nabla \mathbf{v}) \mathbf{w}) \cdot \mathbf{v})}{\|\mathbf{v}\|^2} + \alpha \kappa (\alpha \|\mathbf{v}\|^2 + \beta \|\mathbf{w}\|^2) = 0 \quad (\text{S-4})$$

Similarly we will repeat the exercise but this time take a double contraction with  $\mathbf{w} \otimes \mathbf{w}$

- $\mathbf{v} \cdot \nabla \boldsymbol{\tau} = \frac{\partial \tau_{ij}}{\partial x_k} v_k$  when double contracted with  $\mathbf{w} \otimes \mathbf{w}$  we obtain:  $\frac{\partial \tau_{ij}}{\partial x_k} v_k w_i w_j$

$$\begin{aligned} v_k w_i w_j \frac{\partial \tau_{ij}}{\partial x_k} &= v_k w_i w_j \frac{\partial (\alpha v_i v_j + \beta w_i w_j + \gamma (v_i w_j + w_i v_j))}{\partial x_k} \\ &= v_k w_i w_j \left( w_i w_j \frac{\partial \beta}{\partial x_k} + \beta w_i \frac{\partial w_j}{\partial x_k} + \beta w_j \frac{\partial w_i}{\partial x_k} + \gamma w_j \frac{\partial v_i}{\partial x_k} + \gamma w_i \frac{\partial v_j}{\partial x_k} \right) \end{aligned}$$

While expanding the derivative, we again drop the terms corresponding to orthogonality of  $\mathbf{v}, \mathbf{w}$

$$= \|\mathbf{w}\|^4 \nabla \beta \cdot \mathbf{v} + 2\|\mathbf{w}\|^2 \beta ((\nabla \mathbf{w}) \mathbf{v}) \cdot \mathbf{w} + 2\gamma \|\mathbf{v}\|^2 ((\nabla \mathbf{v}) \mathbf{v}) \cdot \mathbf{w}$$

- $(\nabla \mathbf{v}) \boldsymbol{\tau}$  when double contracted with  $\mathbf{w} \otimes \mathbf{w}$  we obtain:  $\frac{\partial v_i}{\partial x_k} \tau_{kj} w_i w_j$

$$\begin{aligned} \frac{\partial v_i}{\partial x_k} \tau_{kj} w_i w_j &= w_i w_j \frac{\partial v_i}{\partial x_k} (\alpha v_k v_j + \beta w_k w_j + \gamma (v_k w_j + w_k v_j)) \\ &= \|\mathbf{w}\|^2 \left( \beta ((\nabla \mathbf{v}) \mathbf{w}) \cdot \mathbf{w} + \gamma ((\nabla \mathbf{v}) \mathbf{v}) \cdot \mathbf{w} \right) \end{aligned}$$

- $\boldsymbol{\tau} (\nabla \mathbf{v})^T$  when double contracted with  $\mathbf{w} \otimes \mathbf{w}$  we obtain:  $\tau_{ik} \frac{\partial v_j}{\partial x_k} w_i w_j$

$$\begin{aligned} \tau_{ik} \frac{\partial v_j}{\partial x_k} w_i w_j &= (\alpha v_i v_k + \beta w_i w_k + \gamma (v_i w_k + w_i v_k)) w_i w_j \frac{\partial v_j}{\partial x_k} \\ &= \|\mathbf{w}\|^2 \left( \beta ((\nabla \mathbf{v}) \mathbf{w}) \cdot \mathbf{w} + \gamma ((\nabla \mathbf{v}) \mathbf{v}) \cdot \mathbf{w} \right) \end{aligned}$$

- $\kappa tr(\boldsymbol{\tau})\boldsymbol{\tau}$  when double contracted with  $\mathbf{w} \otimes \mathbf{w}$  we obtain:  $\kappa\tau_{kk}\tau_{ij}w_iw_j$

$$\kappa\tau_{kk}\tau_{ij}w_iw_j = \kappa(\alpha v_k v_k + \beta w_k w_k + \gamma(v_k w_k + w_k v_k))(\alpha v_i v_j + \beta w_i w_j + \gamma(v_i w_j + w_i v_j))w_i w_j$$

$$= \kappa\|\mathbf{w}\|^4\beta(\alpha\|\mathbf{v}\|^2 + \beta\|\mathbf{w}\|^2)$$

- $A\boldsymbol{\tau}\boldsymbol{\tau}$  when double contracted with  $\mathbf{w} \otimes \mathbf{w}$  we obtain:  $A\tau_{ik}\tau_{kj}w_iw_j = A(\beta^2\|\mathbf{w}\|^2 + \gamma^2\|\mathbf{v}\|^2)\|\mathbf{w}\|^4$

On putting all terms corresponding to Linear PTT together:

$$\|\mathbf{w}\|^4\nabla\beta\cdot\mathbf{v} + 2\beta\|\mathbf{w}\|^2(((\nabla\mathbf{w})\mathbf{v})\cdot\mathbf{w} - ((\nabla\mathbf{v})\mathbf{w})\cdot\mathbf{w}) + \|\mathbf{w}\|^4\beta\kappa(\alpha\|\mathbf{v}\|^2 + \beta\|\mathbf{w}\|^2) = 0 \quad (\text{S-5})$$

$$(\mathbf{v}\cdot\nabla)\beta + 2\beta\frac{(((\nabla\mathbf{w})\mathbf{v})\cdot\mathbf{w} - ((\nabla\mathbf{v})\mathbf{w})\cdot\mathbf{w})}{\|\mathbf{w}\|^2} + \beta\kappa(\alpha\|\mathbf{v}\|^2 + \beta\|\mathbf{w}\|^2) = 0 \quad (\text{S-6})$$

For the final equation we will double contract with:  $\mathbf{v} \otimes \mathbf{w} + \mathbf{w} \otimes \mathbf{v}$

- $\mathbf{v}\cdot\nabla\boldsymbol{\tau} = \frac{\partial\tau_{ij}}{\partial x_k}v_k$  when double contracted with  $\mathbf{v} \otimes \mathbf{w} + \mathbf{w} \otimes \mathbf{v}$  we obtain:  $\frac{\partial\tau_{ij}}{\partial x_k}v_kv_iw_j + \frac{\partial\tau_{ij}}{\partial x_k}v_kv_iw_j$

$$\frac{\partial\tau_{ij}}{\partial x_k}v_kv_iw_j + \frac{\partial\tau_{ij}}{\partial x_k}v_kv_iw_j = v_kv_iw_j\frac{\partial(\alpha v_i v_j + \beta w_i w_j + \gamma(v_i w_j + w_i v_j))}{\partial x_k} +$$

$$v_kv_iw_j\frac{\partial(\alpha v_i v_j + \beta w_i w_j + \gamma(v_i w_j + w_i v_j))}{\partial x_k}$$

$$= v_kv_iw_j\left(\alpha v_i\frac{\partial v_j}{\partial x_k} + \beta w_j\frac{\partial w_i}{\partial x_k} + v_iw_j\frac{\partial\gamma}{\partial x_k} + \gamma w_j\frac{\partial v_i}{\partial x_k} + \gamma v_i\frac{\partial w_j}{\partial x_k}\right) +$$

$$v_k w_i v_j \left( \alpha v_j \frac{\partial v_i}{\partial x_k} + \beta w_i \frac{\partial w_j}{\partial x_k} + w_i v_j \frac{\partial \gamma}{\partial x_k} + \gamma w_i \frac{\partial v_j}{\partial x_k} + \gamma v_j \frac{\partial w_i}{\partial x_k} \right)$$

While expanding the derivative, we again drop the terms corresponding to orthogonality of  $\mathbf{v}, \mathbf{w}$

$$= 2\|\mathbf{v}\|^2 \alpha (\nabla \mathbf{v}) \mathbf{v} \cdot \mathbf{w} + 2\|\mathbf{w}\|^2 \beta ((\nabla \mathbf{w}) \mathbf{v}) \cdot \mathbf{v} + 2\|\mathbf{v}\|^2 \|\mathbf{w}\|^2 ((\nabla \gamma) \cdot \mathbf{v}) +$$

$$2\gamma \|\mathbf{w}\|^2 ((\nabla \mathbf{v}) \mathbf{v}) \cdot \mathbf{v} + 2\gamma \|\mathbf{v}\|^2 ((\nabla \mathbf{w}) \mathbf{v}) \cdot \mathbf{w}$$

- $(\nabla \mathbf{v}) \boldsymbol{\tau}$  when double contracted with  $\mathbf{v} \otimes \mathbf{w} + \mathbf{w} \otimes \mathbf{v}$  we obtain:  $\frac{\partial v_i}{\partial x_k} \tau_{kj} (v_i w_j + w_i v_j)$

$$\frac{\partial v_i}{\partial x_k} \tau_{kj} (v_i w_j + w_i v_j) = (v_i w_j + w_i v_j) \frac{\partial v_i}{\partial x_k} (\alpha v_k v_j + \beta w_k w_j + \gamma (v_k w_j + w_k v_j))$$

$$= \|\mathbf{w}\|^2 (\beta ((\nabla \mathbf{v}) \mathbf{w}) \cdot \mathbf{v} + \gamma ((\nabla \mathbf{v}) \mathbf{v}) \cdot \mathbf{v}) + \|\mathbf{v}\|^2 (\alpha ((\nabla \mathbf{v}) \mathbf{v}) \cdot \mathbf{w} + \gamma ((\nabla \mathbf{v}) \mathbf{w}) \cdot \mathbf{w})$$

- $\boldsymbol{\tau} (\nabla \mathbf{v})^T$  when double contracted with  $\mathbf{v} \otimes \mathbf{w} + \mathbf{w} \otimes \mathbf{v}$  we obtain:  $\tau_{ik} \frac{\partial v_j}{\partial x_k} (v_i w_j + w_i v_j)$

$$\tau_{ik} \frac{\partial v_j}{\partial x_k} (v_i w_j + w_i v_j) = (v_i w_j + w_i v_j) (\alpha v_i v_k + \beta w_i w_k + \gamma (v_i w_k + w_i v_k)) \frac{\partial v_j}{\partial x_k}$$

$$= \|\mathbf{v}\|^2 (\alpha ((\nabla \mathbf{v}) \mathbf{v}) \cdot \mathbf{w} + \gamma ((\nabla \mathbf{v}) \mathbf{w}) \cdot \mathbf{w}) + \|\mathbf{w}\|^2 (\beta ((\nabla \mathbf{v}) \mathbf{w}) \cdot \mathbf{v} + \gamma ((\nabla \mathbf{v}) \mathbf{v}) \cdot \mathbf{v})$$

- $\kappa \text{tr}(\boldsymbol{\tau}) \boldsymbol{\tau}$  when double contracted with  $\mathbf{v} \otimes \mathbf{w} + \mathbf{w} \otimes \mathbf{v}$  we obtain:  $\kappa \tau_{kk} \tau_{ij} (v_i w_j + w_i v_j)$

$$\kappa \tau_{kk} \tau_{ij} (v_i w_j + w_i v_j) = \kappa (\alpha v_k v_k + \beta w_k w_k + \gamma (v_k w_k + w_k v_k)) (\alpha v_i v_j + \beta w_i w_j + \gamma (v_i w_j + w_i v_j)) (v_i w_j + w_i v_j)$$

$$= 2\kappa\gamma(\alpha\|\mathbf{v}\|^2 + \beta\|\mathbf{w}\|^2)\|\mathbf{v}\|^2\|\mathbf{w}\|^2$$

- $A\boldsymbol{\tau}\boldsymbol{\tau}$  when double contracted with  $\mathbf{v}\otimes\mathbf{w}+\mathbf{w}\otimes\mathbf{v}$  we obtain:  $A\tau_{ik}\tau_{kj}(v_iw_j+w_iv_j)=A(2\alpha\gamma\|\mathbf{v}\|^2+2\beta\gamma\|\mathbf{w}\|^2)\|\mathbf{v}\|^2\|\mathbf{w}\|^2$

On putting all terms corresponding to Linear PTT together:

$$\begin{aligned} & \|\mathbf{v}\|^2\|\mathbf{w}\|^2\nabla\gamma.\mathbf{v} + \beta\|\mathbf{w}\|^2(((\nabla\mathbf{w})\mathbf{v}).\mathbf{v} - ((\nabla\mathbf{v})\mathbf{w}).\mathbf{v}) + \gamma\|\mathbf{v}\|^2(((\nabla\mathbf{w})\mathbf{v}).\mathbf{w} - ((\nabla\mathbf{v})\mathbf{w}).\mathbf{w}) \\ & + \kappa\gamma(\alpha\|\mathbf{v}\|^2 + \beta\|\mathbf{w}\|^2)\|\mathbf{v}\|^2\|\mathbf{w}\|^2 = 0 \end{aligned} \quad (\text{S-7})$$

$$\begin{aligned} & (\mathbf{v}.\nabla)\gamma + \beta\frac{(((\nabla\mathbf{w})\mathbf{v}).\mathbf{v} - ((\nabla\mathbf{v})\mathbf{w}).\mathbf{v})}{\|\mathbf{v}\|^2} + \gamma\frac{(((\nabla\mathbf{w})\mathbf{v}).\mathbf{w} - ((\nabla\mathbf{v})\mathbf{w}).\mathbf{w})}{\|\mathbf{w}\|^2} + \\ & \kappa\gamma(\alpha\|\mathbf{v}\|^2 + \beta\|\mathbf{w}\|^2) = 0 \end{aligned} \quad (\text{S-8})$$

Before proceeding ahead we will drive some sub-parts for final simplification. We know that  $\|\mathbf{v}\|^2\|\mathbf{w}\|^2 = 1$  this in tensorial notation is  $v_iv_iw_jw_j = 1$ . Taking gradient of this expression gives

$$2v_i\frac{\partial v_i}{\partial x_k}w_jw_j + 2w_j\frac{\partial w_j}{\partial x_k}v_iv_i = 0 \text{ Taking dot with } \mathbf{v}$$

$$((\nabla\mathbf{w})\mathbf{v}).\mathbf{w}\|\mathbf{v}\|^2 + ((\nabla\mathbf{v})\mathbf{w}).\mathbf{v}\|\mathbf{w}\|^2 = 0 \quad (\text{S-9})$$

eq (23) can be used to rewrite  $\frac{((\nabla\mathbf{w})\mathbf{v}).\mathbf{w}-((\nabla\mathbf{v})\mathbf{w}).\mathbf{w}}{\|\mathbf{w}\|^2}$  as:

$$-(((\nabla\mathbf{v})\mathbf{w}).\mathbf{v}\|\mathbf{w}\|^2) + ((\nabla\mathbf{v})\mathbf{w}).\mathbf{w}\|\mathbf{v}\|^2)$$

At this point we can invoke definitions of individual terms and the continuity equation to simplify the result as.

$$-(((\nabla \mathbf{v})\mathbf{v})\cdot\mathbf{v}\|\mathbf{w}\|^2)+((\nabla \mathbf{v})\mathbf{w})\cdot\mathbf{w}\|\mathbf{v}\|^2) = -(u^2(\frac{\partial u}{\partial x} + \frac{\partial v}{\partial y})+v^2(\frac{\partial u}{\partial x} + \frac{\partial v}{\partial y})+uv(\frac{\partial v}{\partial x} + \frac{\partial u}{\partial y} - \frac{\partial v}{\partial x} - \frac{\partial u}{\partial y}))$$

$$\text{Therefore we can conclude: } \frac{((\nabla \mathbf{w})\mathbf{v})\cdot\mathbf{w} - ((\nabla \mathbf{v})\mathbf{w})\cdot\mathbf{w}}{\|\mathbf{w}\|^2} = 0 \quad (\text{S-10})$$

eq (S-10) is an important result as it simplifies few of the terms in eqs (S-8) and (S-6) to 0. Next we look at  $v_i w_i = 0$ . Taking gradient of the expression, followed by a dot product with  $\mathbf{v}$  gives:

$$(\nabla \mathbf{w})\mathbf{v}\cdot\mathbf{v} + (\nabla \mathbf{v})\mathbf{v}\cdot\mathbf{w} = 0$$

This result can be used to rewrite the expression:

$$\frac{((\nabla \mathbf{w})\mathbf{v})\cdot\mathbf{v} - ((\nabla \mathbf{v})\mathbf{w})\cdot\mathbf{v}}{\|\mathbf{v}\|^2} = -\left(\frac{((\nabla \mathbf{v})\mathbf{v})\cdot\mathbf{w} + ((\nabla \mathbf{v})\mathbf{w})\cdot\mathbf{v}}{\|\mathbf{v}\|^2}\right)$$

Similar to previous case we substitute the values of individual terms to obtain:

$$= \frac{1}{\|\mathbf{v}\|^2} \left[ 2uv \frac{\partial u}{\partial x} - 2uv \frac{\partial v}{\partial y} - (u^2 - v^2) \frac{\partial v}{\partial x} - (u^2 - v^2) \frac{\partial u}{\partial y} \right]$$

$$\text{The above expression is : } \frac{1}{\|\mathbf{v}\|^2} \left[ 2uv \frac{\partial u}{\partial x} - 2uv \frac{\partial v}{\partial y} - (u^2 - v^2) \frac{\partial v}{\partial x} - (u^2 - v^2) \frac{\partial u}{\partial y} \right] = \nabla \cdot \mathbf{w} \quad (\text{S-11})$$

This result can be obtained by finding divergence of  $\mathbf{w}$  using its definition. Finally we use eq (S-10) and eq (S-11) to simplify eq (S-8), (S-6), and (S-4) to get:



$$(\mathbf{v} \cdot \nabla)\alpha + 2\gamma \nabla \cdot \mathbf{w} + \alpha \kappa (\alpha \|\mathbf{v}\|^2 + \beta \|\mathbf{w}\|^2) = 0 \quad (\text{S-12})$$

$$(\mathbf{v} \cdot \nabla)\beta + \beta \kappa (\alpha \|\mathbf{v}\|^2 + \beta \|\mathbf{w}\|^2) = 0 \quad (\text{S-13})$$

$$(\mathbf{v} \cdot \nabla)\gamma + \beta \nabla \cdot \mathbf{w} + \kappa \gamma (\alpha \|\mathbf{v}\|^2 + \beta \|\mathbf{w}\|^2) = 0 \quad (\text{S-14})$$

Similarly terms in Geisekus are combined to give:

$$(\mathbf{v} \cdot \nabla)\alpha + 2\gamma \nabla \cdot \mathbf{w} + A(\alpha^2 \|\mathbf{v}\|^2 + \gamma^2 \|\mathbf{w}\|^2) = 0 \quad (\text{S-15})$$

$$(\mathbf{v} \cdot \nabla)\beta + A(\beta^2 \|\mathbf{w}\|^2 + \gamma^2 \|\mathbf{v}\|^2) = 0 \quad (\text{S-16})$$

$$(\mathbf{v} \cdot \nabla)\gamma + \beta \nabla \cdot \mathbf{w} + A(\alpha \gamma \|\mathbf{v}\|^2 + \beta \gamma \|\mathbf{w}\|^2) = 0 \quad (\text{S-17})$$

Combined eq (S-12), (S-13), (S-14) is the final form of governing equation for the stress tensor  $\boldsymbol{\tau}$  following linear PTT constitutive law under high *Wi* flow.

The term  $\mathbf{v} \cdot \nabla$  is a scalar operator that returns the rate of change of the corresponding input variable along the streamline. In eq (S-13) the term  $\kappa(\alpha \|\mathbf{v}\|^2 + \beta \|\mathbf{w}\|^2)$  corresponds to the trace of stress tensor  $\boldsymbol{\tau}$  and is always positive. Therefore, in eq (S-13)  $\beta$  has to monotonically decrease along a streamline. This is not always physical for instance, in closed streamline flows or even for open streamline flows it requires very large value of  $\beta$  upstream to ensure non-negative values of  $\beta$ . Using this argument we observe that  $\beta = 0$  is the only value that always satisfies eq (S-13) without any loss of physical sense. Now on substituting  $\beta = 0$  in eq (S-14) we again refer to our previous argument to conclude  $\gamma = 0$  which then can

be substituted in eq (S-12) to conclude  $\alpha = 0$ . Similarly we can use the above arguments in eq (S-15), (S-16) and, (S-17) to conclude  $\alpha = \beta = \gamma = 0$ . Having functions  $\alpha, \beta, \gamma$  all equal to zero implies that the stress tensor  $\boldsymbol{\tau} = 0$ . This result is physically unacceptable as it implies 0 stress for non stationary flow.

Therefore, we can conclude that the terms corresponding to the  $tr(\boldsymbol{\tau})\boldsymbol{\tau}$  and  $\boldsymbol{\tau}\boldsymbol{\tau}$  are giving physically inconsistent results suggesting to drop them entirely from the equations. Physically it means that the order of the term  $\kappa tr(\boldsymbol{\tau})\boldsymbol{\tau}$  and  $A\boldsymbol{\tau}\boldsymbol{\tau}$  are lesser than the upper convected term. Retaining the term by assuming it to have the same order as the upper convected term is physically not possible as it means 0 stresses. In conclusion, at High  $Wi$  limit  $\bar{\boldsymbol{\tau}}^* = 0$  is the final dimensionless form of the constitutive law.

## Derivation of Eq (10)

The mass and momentum equation for the quasi-radial, quasi-steady, and axis symmetric flow conditions are given below with  $u_r := u$  and  $u_z := v$ .

$$\frac{\partial u}{\partial r} + \frac{\partial v}{\partial z} + \frac{u}{r} = 0 \quad (1)$$

$$\rho \left( u \frac{\partial u}{\partial r} \right) = - \frac{\partial p}{\partial r} + \frac{\partial \tau_{rr}}{\partial r} + \frac{\tau_{rr}}{r} + \frac{\partial \tau_{rz}}{\partial z} \quad (2a)$$

$$0 = - \frac{\partial p}{\partial z} + \frac{\partial \tau_{zz}}{\partial z} + \frac{\tau_{rz}}{r} + \frac{\partial \tau_{rz}}{\partial r} \quad (2b)$$

Following are the components of Lower convected derivative in low  $Re$  and high  $Wi$  flow under axis symmetric assumption:

$$u \frac{\partial \tau_{rr}}{\partial r} + 2\tau_{rr} \frac{\partial u}{\partial r} = 2 \frac{\eta}{\lambda} \frac{\partial u}{\partial r} \quad (3a)$$

$$u \frac{\partial \tau_{zz}}{\partial r} - 2\tau_{zz} \frac{\partial u}{\partial r} = -2 \frac{\eta}{\lambda} \frac{\partial u}{\partial r} \quad (3b)$$

$$u \frac{\partial \tau_{rz}}{\partial r} - u \frac{\tau_{rz}}{r} = 0 \quad (3c)$$

To non dimensionalize the above equations we use the following scheme:  $u^* = u/U_c$ ,  $r^* = r/R_c$ ,  $z^* = z/Z_c$ ,  $t^* = t/T_c$ ,  $\tau_{rr}^* = \tau_{rr}/\tau_{rc}$  and  $\tau_{rz}^* = \tau_{rz}/\tau_{zc}$ , where  $T_c := R_c/U_c$ ,  $U_c$ ,  $R_c = R_o$ ,  $Z_c = R_c^2/R_o$ ,  $\tau_{rc}$  and  $\tau_{zc}$  are the characteristic time, velocity, lengths and stresses respectively. Here  $U_c := \sqrt{\eta/\rho\lambda}$  is the shear wave velocity,  $\tau_{rc} = \eta/\lambda$  is shear modulus,  $Z_c = R_o/2$ ,  $\tau_{zc} := \tau_{rc}/Wi_c$  with  $Wi_c = \lambda U_c/R_o$ , and  $P_c = \sigma/R_o$  is the characteristic pressure. On substituting these in Eq set 3a and 3c, we obtain:

$$u^* \frac{\partial \tau_{rr}^*}{\partial r^*} + 2\tau_{rr}^* \frac{\partial u^*}{\partial r^*} = 2 \frac{\partial u^*}{\partial r^*} \quad (4a)$$

$$u^* \frac{\partial \tau_{rz}^*}{\partial r^*} - u^* \frac{\tau_{rz}^*}{r^*} = 0 \quad (4b)$$

On integrating along  $r$  direction in  $z = 0$  plane, the dimensionless  $rr$  and  $rz$  components of stress tensor are:

$$\tau_{rr}^* = 1 + K_1/(u^*)^2 \quad (5a)$$

$$\tau_{rz}^* = K_2 r^* \quad (5b)$$

Here,  $K_1$  and  $K_2$  are dimensionless integrating constants which in general are functions of  $z$  locally. Further the radial momentum equation is simplified to obtain:

$$\left( \frac{\rho U_c^2}{R_o} \right) u^* \frac{\partial u^*}{\partial r^*} = - \frac{P_c}{R_o} \frac{\partial p^*}{\partial r^*} + \frac{\tau_{rc}}{R_o} \left( \frac{\partial \tau_{rr}^*}{\partial r^*} + \frac{\tau_{rr}^*}{r^*} \right) + \frac{\tau_{zc}}{Z_c} \frac{\partial \tau_{rz}^*}{\partial z^*}$$

First term on RHS  $\frac{P_c}{R_o} \frac{\partial \eta^*}{\partial r^*}$  can be rewritten as  $m_1 \frac{\sigma}{R_o^2} \frac{p^*}{R^*}$  with  $p^* = \left(\frac{1}{R^*} + \frac{2}{(R^*)^2}\right)$ .<sup>2</sup> Here  $m_1$  is the scaling coefficient.

$$\begin{aligned} \left(\frac{\rho U_c^2}{R_o}\right) u^* \frac{\partial u^*}{\partial r^*} &= m_1 \frac{\sigma}{R_o^2} \frac{1}{R^*} \left(\frac{1}{R^*} + \frac{2R_o}{(R^*)^2 R_o}\right) + \frac{\tau_{rc}}{R_o} \left(\frac{\partial \tau_{rr}^*}{\partial r^*} + \frac{\tau_{rr}^*}{r^*}\right) + \frac{\tau_{zc}}{Z_c} \frac{\partial \tau_{rz}^*}{\partial z^*} \\ u^* \frac{\partial u^*}{\partial r^*} &= m_1 \frac{\sigma \lambda}{\eta R_o} \frac{1}{R^*} \left(\frac{1}{R^*} + \frac{2}{(R^*)^2}\right) + \left(\frac{\partial \tau_{rr}^*}{\partial r^*} + \frac{\tau_{rr}^*}{r^*}\right) + \frac{2}{Wi_c} \frac{\partial \tau_{rz}^*}{\partial z^*} \end{aligned} \quad (6)$$

Further  $m_2$  and  $m_3$  defined here as the scaling coefficients of elastic and viscous terms respectively along with  $r^* \sim R^* = R/R_o$ ,  $z^* \sim Z^* = (R/R_o)^2$   $u^* \sim U^* = U/U_c$  are introduced to obtain the scaled equation for neck evolution.

$$\frac{(U^*)^2}{R^*} = m_1 \frac{\sigma \lambda}{\eta R_o} \frac{1}{R^*} \left(\frac{1}{R^*} + \frac{2}{(R^*)^2}\right) + m_2 \frac{\tau_{rr}^*}{R^*} + \frac{2m_3}{Wi_c} \frac{\tau_{rz}^*}{Z^*} \quad (7)$$

From Eq 8a  $\tau_{rr}^* \sim 1 + K_1/(U^*)^2 \sim K_1'(1 + 1/(U^*)^2)$  as  $1/U^*$  is the dominant term and the new scaling coefficient  $K_1'$  will adjust the minor contributions by  $1/K_1$  term similarly Eq 5b gives  $\tau_{rz}^* \sim K_2 R^*$ . These when substituted in Eq 7 gives:

$$\frac{(U^*)^2}{R^*} = M_1 \frac{1}{R^*} \left(\frac{1}{R^*} + \frac{2}{(R^*)^2}\right) + \frac{M_2}{R^*} \left(1 + \frac{1}{(U^*)^2}\right) + \frac{2M_3}{Wi_c} \frac{R^*}{Z^*} \quad (8)$$

Here  $M_1 := m_1 \frac{\sigma \lambda}{\eta R_o} = \frac{m_1}{Ec_{-1}}$ ,  $M_2 := m_2 K_1'$ , and  $M_3 := m_3 K_2$  are the final scaling coefficients that have absorbed all the previous parameters. Eq 8 is simplified further to obtain the dimensionless neck evolution equation as :

$$\begin{aligned} (U^*)^2 &= M_1 \left(\frac{1}{R^*} + \frac{2}{(R^*)^2}\right) + M_2 \left(1 + \frac{1}{(U^*)^2}\right) + \frac{2M_3}{Wi_c} \\ (U^*)^4 - \left(M_1 \left(\frac{1}{R^*} + \frac{2}{(R^*)^2}\right) + M_2 + \frac{2M_3}{Wi_c}\right) (U^*)^2 - M_2 &= 0 \end{aligned} \quad (9)$$

# Experimental setup validation

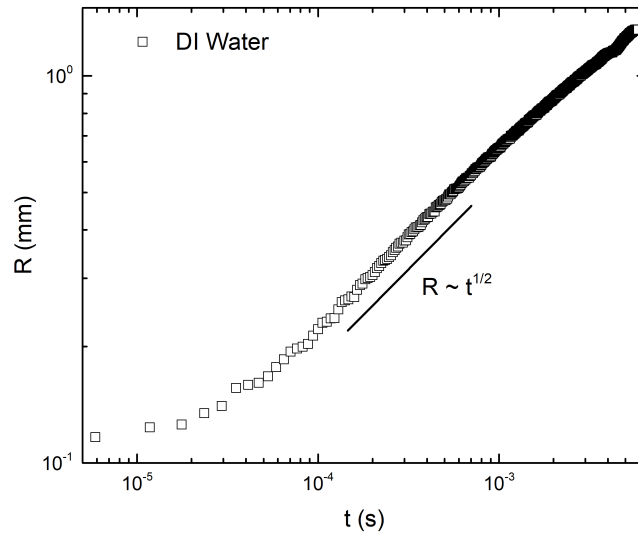

Figure S1: Neck radius evolution of DI water.

# Power law fit

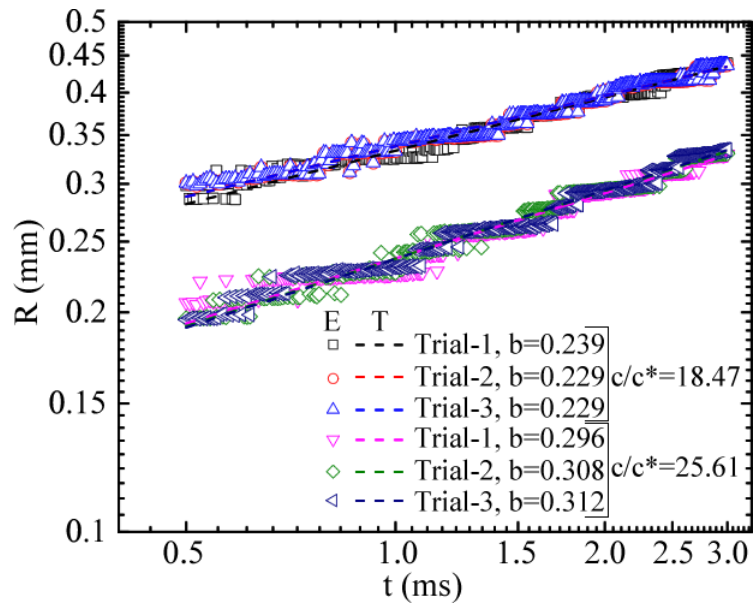

Figure S2: Temporal evolution of neck radius in the region of interest for different experimental trials of  $c/c^* = 18.47, 25.61$ .

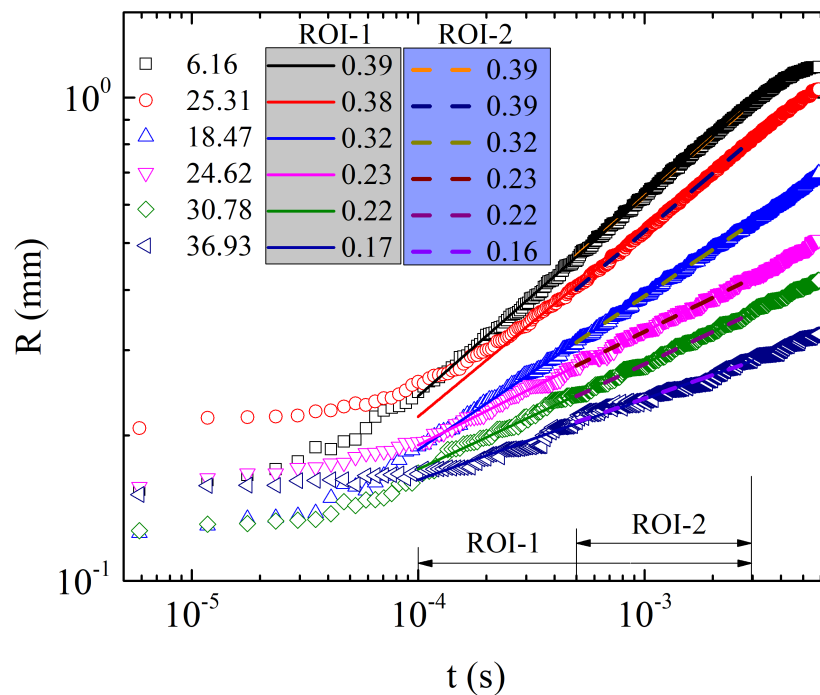

Figure S3: Power law fitting for different ROIs.

## Constants and Dimensionless numbers

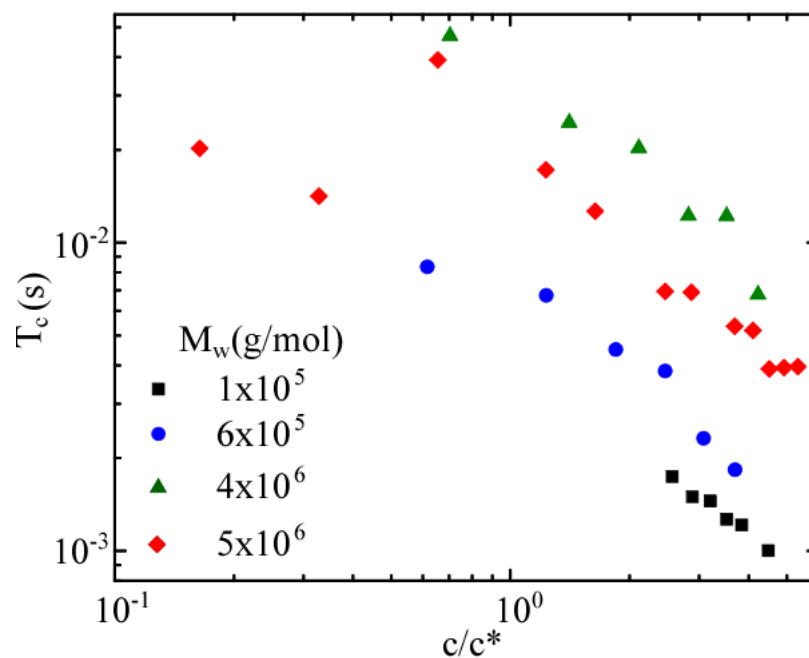

Figure S4: Variation of characteristic time  $T_c$  with  $c/c^*$  across molecular weights.

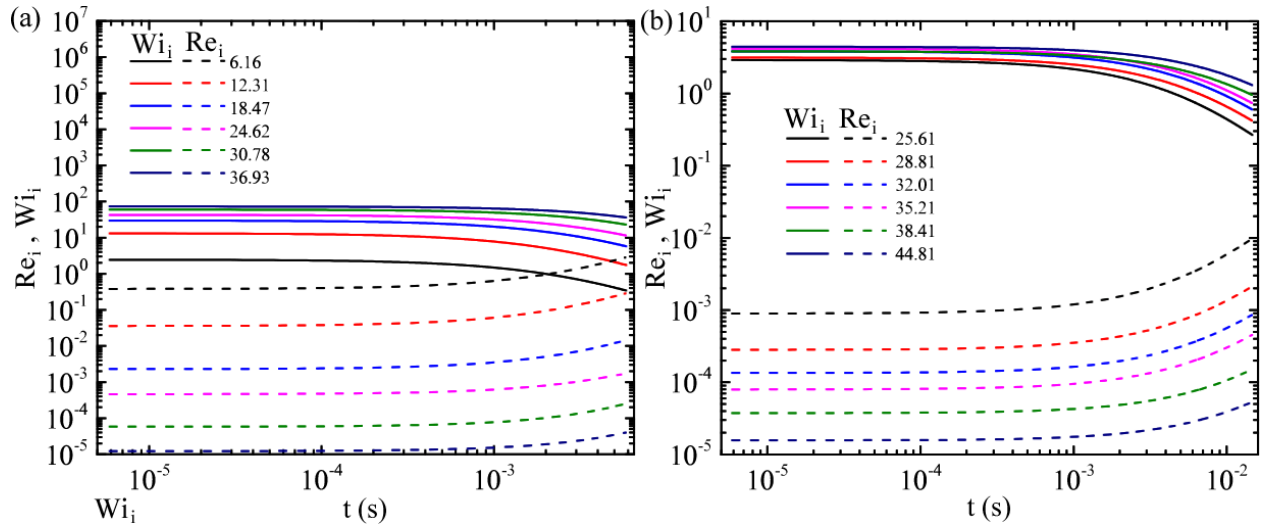

Figure S5: Variation of non-dimensional numbers  $Re$  and  $Wi$  with time for PEO of (a)  $M_w = 6 \times 10^5$  and (b)  $M_w = 1 \times 10^5$  g/mol.

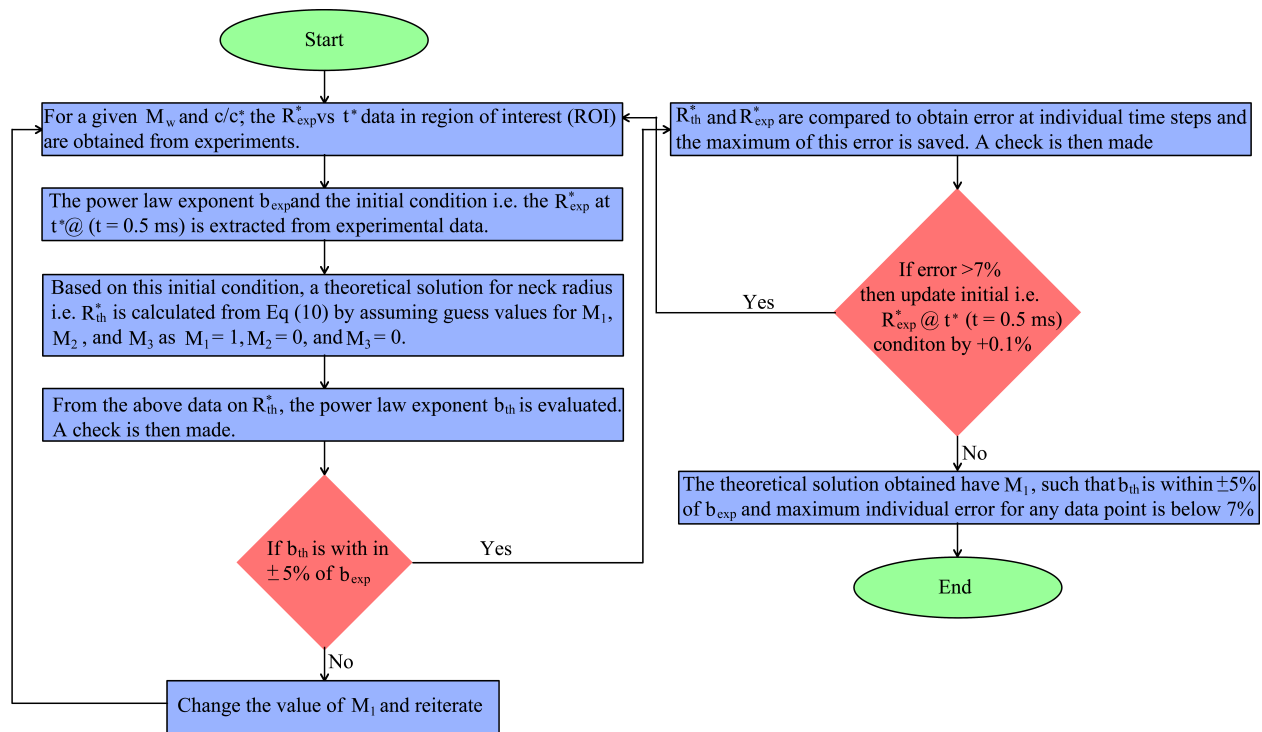

Figure S6: Flow chart represent the algorithm to obtain  $M_1$  values.

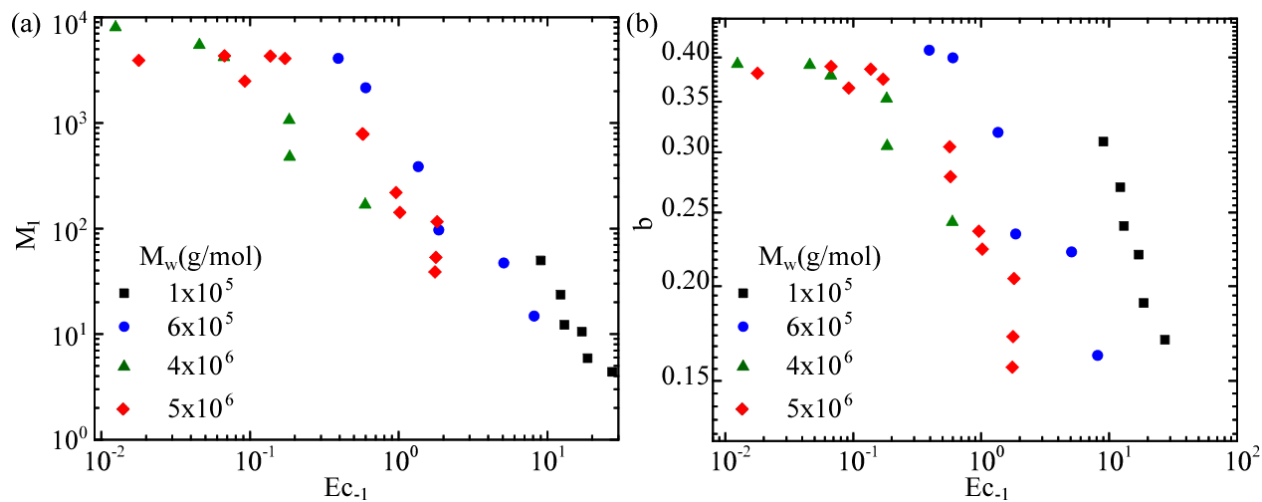

Figure S7: (a) Variation of  $M_1$  with  $Ec_{-1}$  and (b) Variation of  $b$  with  $Ec_{-1}$  across molecular weights.

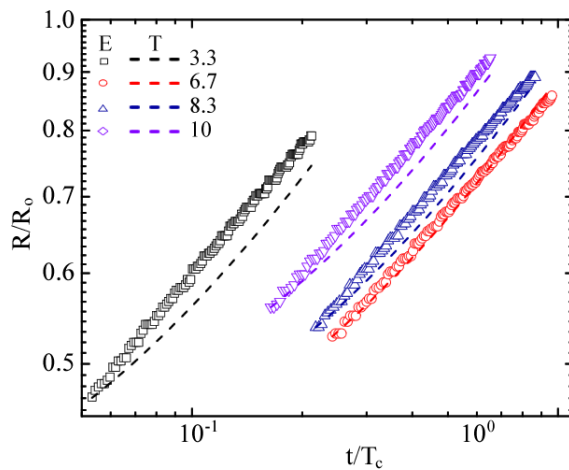

Figure S8: Comparison of dimensionless neck radius evolution obtained from experiments with solution of Eq (10) for various  $c/c^*$  of PAM  $M_w = 5 \times 10^6$  g/mol. (obtained from Varma et al.<sup>3</sup>).



# Arrested Coalescence

## Analysis

$$-M_1 = \frac{M_2(1 + \frac{2}{Wi_c})}{\frac{1}{R^*} + \frac{2}{(R^*)^2}} \quad (10)$$

$$-\frac{m_1}{Ec_{-1}} = \frac{M_2(1 + \frac{2}{Wi_c})}{\frac{1}{R^*} + \frac{2}{(R^*)^2}}$$

The term in denominator  $\mathcal{O}(\frac{2}{(R^*)^2}) > \mathcal{O}(\frac{1}{R^*})$  therefore we can neglect the lower order term to get an approximate value for  $\theta_{arrest}$ . Similarly in numerator  $1 > 2/Wi_c$  for high elasticity droplets(that will show arrest)

$$\begin{aligned} -\frac{m_1}{Ec_{-1}M_2} &= \frac{(R^*)^2}{2} = \frac{\theta_{arrest}^2}{2} \\ \frac{20}{Ec_{-1}} &= \theta_{arrest}^2 \end{aligned} \quad (11)$$

## DI Water

$$R(t = 0.5 \text{ ms}) = 0.41 \text{ mm and } R(t = 3 \text{ ms}) = 0.89 \text{ mm}$$

$$\dot{\gamma}_{DI} = \frac{R(t=3 \text{ ms}) - R(t=0.5 \text{ ms})}{R(t=0.5 \text{ ms})(3-0.5)}$$

$$\dot{\gamma}_{DI} = 0.47 \text{ ms}^{-1}$$

$$\text{PEO } M_w = 1 \times 10^5 \text{ g/mol, } c/c^* = 70$$

$$R(t = 0.5 \text{ ms}) = 0.24 \text{ mm and } R(t = 1000 \text{ ms}) = 0.74 \text{ mm}$$

$$\dot{\gamma}_{arrest} = \frac{R(t=1000 \text{ ms}) - R(t=0.5 \text{ ms})}{R(t=0.5 \text{ ms})(1000-0.5)}$$

$$\dot{\gamma}_{arrest} = 0.002 \text{ ms}^{-1}$$

$$\dot{\gamma}_{arrest}/\dot{\gamma}_{DI} * 100 = 0.43\%$$

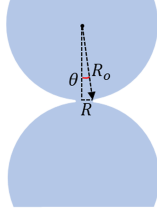

Figure S9: Schematic of the angle  $\theta$  subtended at the neck.

## Rheology, Non-Dimensional numbers, Non-Dimensionalising Variables

The relaxation time  $\lambda$  for all the solutions are obtained using the Zimm model<sup>4</sup> .

$$\lambda_z = \frac{1}{\zeta(3\nu)} \frac{[\eta]M_w\eta_s}{N_A k_B T} \quad (12)$$

Here,  $\eta_s$ ,  $k_B$ ,  $\lambda_z$ ,  $T$ ,  $\nu$  are solvent viscosity, Boltzmann constant, Zimm relaxation time, absolute temperature and fractal polymer dimension determined using the relation  $A = 3\nu - 1$ , (where  $A$  is the exponent of Mark-Houwink-Sakurada correlation) respectively. The relaxation times of the solutions in semi-dilute unentangled  $\lambda_{\text{SUE}}$  and semi-dilute entangled  $\lambda_{\text{SE}}$  regimes, are obtained using these correlations :  $\lambda_{\text{SUE}} = \lambda_z \left(\frac{c}{c^*}\right)^{\frac{2-3\nu}{3\nu-1}}$  and  $\lambda_{\text{SE}} = \lambda_z \left(\frac{c}{c^*}\right)^{\frac{3-3\nu}{3\nu-1} 5-7}$  respectively. The values of viscosity, relaxation time and concentration ratios for molecular weights  $M_w = 5 \times 10^6$  and  $4 \times 10^6$  g/mol are obtained from our previous study.<sup>2</sup>

## References

- (1) Renardy, M. The high Weissenberg number limit of the UCM model and the Euler equations. *Journal of non-newtonian fluid mechanics* **1997**, *69*, 293–301.
- (2) Varma, S. C.; Rajput, A. S.; Kumar, A. Rheocoalescence: Relaxation Time through Coalescence of Droplets. *Macromolecules* **2022**, *55*, 6031–6039.

- (3) Varma, S. C.; Saha, A.; Mukherjee, S.; Bandopadhyay, A.; Kumar, A.; Chakraborty, S. Universality in coalescence of polymeric fluids. *Soft Matter* **2020**, *16*, 10921–10927.
- (4) Bird, R. B.; Armstrong, R. C.; Hassager, O. *Dynamics of polymeric liquids. Vol. 1, 2nd Ed. : Fluid mechanics*; Wiley, 1987.
- (5) Rubinstein, M.; Colby, R. H., et al. *Polymer physics*; Oxford University Press New York, 2003; Vol. 23.
- (6) Liu, Y.; Jun, Y.; Steinberg, V. Concentration dependence of the longest relaxation times of dilute and semi-dilute polymer solutions. *Journal of Rheology* **2009**, *53*, 1069–1085.
- (7) Del Giudice, F.; D’Avino, G.; Greco, F.; De Santo, I.; Netti, P. A.; Maffettone, P. L. Rheometry-on-a-chip: measuring the relaxation time of a viscoelastic liquid through particle migration in microchannel flows. *Lab on a Chip* **2015**, *15*, 783–792.
